# Supplementary material for: A Graph Neural Network Approach for Hierarchical Mapping of Breast Cancer Protein Communities
Source: Research Square preprint supplement (doi:10.21203/rs.3.rs-4478708/v1), 2024-06-11
Supplement: Supplementary file 1 [file 42a33304c9b417bdf8b16621.xlsx]

## Sheet: ACS4931_Manuscript_Table_S3
System ID	Genes	Selection Pressure	p-value	q-value	Input	Rank	Annotation
HOST:2	ANAPC11,BUB3,CDC20,CDC45,CHMP2A,CHMP6,CLP1,CNOT3,COPB1,CPSF3,DTL,EEF1A1,EIF2B2,EIF2B4,EIF2S1,EIF3B,EIF4A3,FCF1,GPN3,HCFC1,HNRNPC,HNRNPK,INTS11,INTS9,ISCU,KPNB1,LSM2,LSM4,LSM6,LSM7,LSM8,NCBP2,NUTF2,PABPN1,PAFAH1B1,POLE2,POLR1A,POLR1C,POLR2B,POLR2C,POLR2E,POLR2G,POLR2L,POLR3A,PRPF19,PSMA1,PSMA2,PSMA3,PSMA4,PSMA5,PSMA6,PSMA7,PSMB1,PSMB2,PSMB3,PSMB4,PUF60,RAN,RBM22,RBM39,RPL12,RPL13,RPL14,RPL19,RPL21…	0.169202	0.002	0.0475	1.0|1.0|1.0|1.0|1.0|1.0|1.0|1.0|1.0|1.0|1.0|1.0|1.0|1.0|1.0|1.0|1.0|1.0|1.0|1.0|1.0|1.0|1.0|1.0|1.0|1.0|1.0|1.0|1.0|1.0|1.0|1.0|1.0|1.0|1.0|1.0|1.0|1.0|1.0|1.0|1.0|1.0|1.0|1.0|1.0|1.0|1.0|1.0|1.0|1.0|1.0|1.0|1.0|1.0|1.0|1.0|1.0|1.0|1.0|1.0|1.0|1.0|1.0|1.0|1.0|1.0|1.0|1.0|1.0|1.0|1.0|1.0|1.0|1.0|1.0|1.0|1.0|1.0|1.0|1.0|1.0|1.0|1.0|1.0|1.0|1.0|1.0|1.0|1.0|1.0|1.0|1.0|0.999999999999996|0.99999999996…	262|262|262|262|262|262|262|262|262|262|262|262|262|262|262|262|262|262|262|262|262|262|262|262|262|262|262|262|262|262|262|262|262|262|262|262|262|262|262|262|262|262|262|262|262|262|262|262|262|262|262|262|262|262|262|262|262|262|262|262|262|262|262|262|262|262|262|262|262|262|262|262|262|262|262|262|262|262|262|262|262|262|262|262|262|262|262|262|262|262|262|262|265|272|285|288|291|293|299|301…	CAL120_BREAST
HOST:2	ANAPC11,CDC45,COPB1,EIF2S1,EIF4A3,GPN3,HNRNPK,KPNB1,LSM2,PAFAH1B1,POLR2C,POLR2L,POLR3A,PRPF19,PSMA1,PSMA3,PSMA5,PSMA6,PSMA7,PSMB3,PSMB4,PUF60,RAN,RPL12,RPL21,RPL31,RPS13,RPS29,RPS4X,SF3B4,SMU1,SNRPB,SNRPD1,SNRPD2,SNRPF,RPL13,RPL27,CDC20,RPS15A,PSMB1,PSMB2,FARSB,RBM39,POLR2B,NCBP2,INTS9,ISCU,LSM7,PSMB5,NUTF2,HCFC1,RPS9,U2AF2,PSMA2,NUP93,RBM22,RPS18,INTS11,PSMB6,RPS2,LSM8,DYNLRB1,EEF1A1,SFPQ,POLR1C…	0.174977	0.002	0.0488	1.0|1.0|1.0|1.0|1.0|1.0|1.0|1.0|1.0|1.0|1.0|1.0|1.0|1.0|1.0|1.0|1.0|1.0|1.0|1.0|1.0|1.0|1.0|1.0|1.0|1.0|1.0|1.0|1.0|1.0|1.0|1.0|1.0|1.0|1.0|0.999999999999994|0.999999999999986|0.99999999999998|0.99999999999998|0.999999999999976|0.999999999999972|0.999999999999963|0.999999999999947|0.999999999999944|0.999999999999937|0.99999999999989|0.999999999999879|0.99999999999987|0.999999999999849|0.999999999…	84|84|84|84|84|84|84|84|84|84|84|84|84|84|84|84|84|84|84|84|84|84|84|84|84|84|84|84|84|84|84|84|84|84|84|85|86|88|88|90|93|95|101|104|106|111|113|116|119|121|124|126|126|128|133|136|141|145|148|152|155|159|160|162|164|165|169|171|173|174|175|177|182|189|193|194|207|208|211|212|215|216|219|222|226|231|232|239|240|241|244|247|249|250|254|263|266|270|278|284|285|296|300|316|317|318|319|330|332|336|3…	T47D_BREAST
HOST:11	EIF2B2,EIF2B4,POLR1A,POLR2B,POLR3A,PSMA1,PSMA2,PSMA3,PSMA4,PSMA5,PSMA6,PSMA7,PSMB1,PSMB2,PSMB3,PSMB4,POLR3B,FARSB,PSMB6,PSMB7,PSMB5,POLR1B,EIF2B1,MRPS2,PSMB8,HADHB,PSMA8,PSMB10,PSMB9,POLR2A,SCP2	0.05796	0.002	0.0475	1.0|1.0|1.0|1.0|1.0|1.0|1.0|1.0|1.0|1.0|1.0|1.0|1.0|1.0|1.0|1.0|0.999996273613228|0.999973974061312|0.999556957199176|0.998523077629918|0.996704352503624|0.991124690089141|0.970616550740662|0.470856543967956|0.261686882417171|0.123109570500602|0.0702755512703695|0.0597693138099463|0.0295473797352489|0.0|0.0	262|262|262|262|262|262|262|262|262|262|262|262|262|262|262|262|293|314|378|417|446|497|620|1419|1809|2439|3014|3210|3963|4968|4968	CAL120_BREAST
HOST:11	POLR3A,PSMA1,PSMA3,PSMA5,PSMA6,PSMA7,PSMB3,PSMB4,PSMB1,PSMB2,FARSB,POLR2B,PSMB5,PSMA2,PSMB6,EIF2B4,PSMA4,POLR3B,POLR1A,PSMB7,EIF2B2,EIF2B1,POLR1B,MRPS2,HADHB,PSMB10,PSMB8,PSMA8,PSMB9,POLR2A,SCP2	0.056224	0.002	0.0488	1.0|1.0|1.0|1.0|1.0|1.0|1.0|1.0|0.999999999999976|0.999999999999972|0.999999999999963|0.999999999999944|0.999999999999849|0.999999999999746|0.999999999999409|0.999992483843795|0.999986047049986|0.999983227802185|0.999968963089338|0.999494414388174|0.997236453102112|0.952932891332207|0.95017832661106|0.551019512487292|0.0357210286038038|0.0227492467057992|0.0139845280036679|0.0052134312942173|0.00…	84|84|84|84|84|84|84|84|90|93|95|104|119|128|148|231|241|247|263|330|396|649|654|1308|3403|3877|4265|4655|4672|4968|4968	T47D_BREAST
HOST:32	CLP1,CPSF3,GPN3,INTS11,INTS9,POLE2,POLA2,CPSF2,PPIL2,POLD2,NAT10,DKC1,MRE11,CWF19L1,CWC27	0.032888	0.002	0.0475	1.0|1.0|1.0|1.0|1.0|1.0|0.999916565593736|0.999839388092166|0.999227910833171|0.988293255537952|0.958277873036468|0.888352301936758|0.464669500867667|0.221936718632787|0.023526147738051	262|262|262|262|262|262|339|355|390|516|701|864|1430|1920|4134	CAL120_BREAST
HOST:32	GPN3,INTS9,INTS11,CLP1,POLA2,CPSF2,CPSF3,POLE2,POLD2,PPIL2,DKC1,NAT10,MRE11,CWC27,CWF19L1	0.031765	0.002	0.0488	1.0|0.99999999999989|0.99999999999949|0.999994664123049|0.99923679400416|0.99779213708699|0.995470636378294|0.995233000126112|0.992410085835493|0.972299279634498|0.961742626591236|0.937694692987926|0.701026850110133|0.132711108805971|0.0655679581798709	84|111|145|226|344|382|415|418|451|550|593|708|1164|2129|2770	T47D_BREAST
HOST:36	EIF2S1,LSM2,LSM4,LSM6,LSM7,LSM8,POLR1C,POLR2C,POLR2E,POLR2G,SNRPD1,SNRPD2,SNRPF,LSM3,LSM5,POLR3H,EXOSC3,EXOSC2,EXOSC1,LSM10,MRPS28,GAR1,NAA38,LSM1,AIMP1,SNRPD3,SNRPE,SNRPG	0.044189	0.002	0.0475	1.0|1.0|1.0|1.0|1.0|1.0|1.0|1.0|1.0|1.0|1.0|1.0|1.0|0.999852733360751|0.997132889686487|0.995155568057012|0.975033421724104|0.971843525429556|0.768056412266755|0.722195803507949|0.71036823309335|0.625651775233083|0.414784339576086|0.0415625431212725|0.0110523256060469|0.0|0.0|0.0	262|262|262|262|262|262|262|262|262|262|262|262|262|350|440|464|580|608|1041|1095|1109|1230|1505|3605|4560|4968|4968|4968	CAL120_BREAST
HOST:37	CDC5L,SUPT6H,POLR2D,PRIM1,RNPC3,SRP9,EIF2S2,POLR2F,CRCP,CCNK,CLNS1A,CDC73,TIPIN,SNAPC3,EIF3D,CPSF4,URI1,PPP1R8,ZMAT5,ANAPC15,HYPK,ZC3H8,HTATSF1,PPP4R2,DMAP1,NPLOC4,THG1L,SEM1,BCL2L1,BPTF,PNN,SNUPN,PAF1,MED18,NPM1,TAF8,UBAP1,DR1,TAF7,CHTF8,PRPF18,INTS12,TAF12,MCL1,BTF3,RRP7A,RBM28,ZNHIT6,NFYB,BCLAF1,BAZ1B,DRAP1,POLE3,ZC3H13,POLR1D,RCOR1,EAF1,TADA2A,GTF3C6,GEMIN6,POLR3D,DPY30,TAF13,CENPS,NCOR1,BAK1…	0.021644	0.002	0.0488	1.0|0.999999999999951|0.99999999999987|0.999999999999158|0.999999999998345|0.999999999989315|0.999999999988823|0.999993466641859|0.999975437396616|0.999960744691866|0.999955343402016|0.999464026670528|0.998048479263313|0.996219790204877|0.995697719350838|0.993888655290528|0.993227095941316|0.991115394286091|0.987234231267382|0.982741324006309|0.981014486987801|0.97835875146243|0.974939778702168|0…	84|100|116|157|172|203|204|228|256|271|273|334|378|405|413|434|442|460|477|500|513|520|534|563|567|569|584|620|645|667|672|681|696|733|754|764|766|791|800|805|839|880|884|911|919|934|1001|1020|1025|1027|1079|1104|1131|1150|1159|1160|1178|1198|1228|1232|1252|1262|1264|1283|1285|1323|1357|1391|1420|1455|1460|1466|1487|1586|1621|1627|1644|1655|1723|1737|1801|1851|1854|1856|1874|1891|1905|1944|1949|1…	T47D_BREAST
HOST:43	AQR,EIF2B3,GINS1,IK,INTS3,KIN,MED11,MED28,MED30,MED6,MFAP1,MPHOSPH10,NDC80,NUP133,PCNA,PDRG1,PFDN2,POLD3,PRPF8,RPA3,RPS7,SF3A3,SLU7,SNW1,SPC25,THOC2,TIMELESS,VPS28,YKT6,ATR,TRAPPC11,DYNC1I2,NUP160,TRAPPC3,TRAPPC8,MAD2L1,ZNF830,MZT1,SMG1,PFDN6,EIF4E,MED14,THOC5,BCAS2,XRCC6,NUF2,MED8,WDR74,PRPF3,SART1,RNF113A,SMG5,XRCC5,NCBP1,MED9,TRAPPC5,GINS2,CDC37,AHCTF1,UPF2,ZMAT2,MED4,LUC7L3,ISY1,NUP214,IMP3,T…	0.188381	0.002	0.0475	1.0|1.0|1.0|1.0|1.0|1.0|1.0|1.0|1.0|1.0|1.0|1.0|1.0|1.0|1.0|1.0|1.0|1.0|1.0|1.0|1.0|1.0|1.0|1.0|1.0|1.0|1.0|1.0|0.999999999999997|0.999999999973334|0.999999984665689|0.999999983280794|0.999999443901763|0.999999078635075|0.999996651427265|0.999991144160448|0.999990313063176|0.999987777628835|0.999979874460074|0.999973255175175|0.999969265392345|0.999958860120878|0.999940998097546|0.999933547265118…	262|262|262|262|262|262|262|262|262|262|262|262|262|262|262|262|262|262|262|262|262|262|262|262|262|262|262|262|264|270|276|280|284|287|292|298|302|304|311|315|320|323|332|335|338|340|343|344|346|347|349|359|360|370|373|375|380|383|384|392|394|395|402|404|405|410|411|412|413|421|425|427|431|437|439|442|445|449|457|461|462|476|477|483|484|487|492|493|504|505|508|509|515|517|519|520|534|535|539|541…	CAL120_BREAST
HOST:43	PCNA,PRPF8,THOC2,GINS1,SF3A3,PPWD1,TIMELESS,VPS28,RPA3,MED30,NDC80,AQR,RPS7,DYNC1H1,XRCC6,POLD3,LUC7L3,MED11,TRMT112,GINS2,MFAP1,IMP3,SLU7,SNW1,PFDN2,SNAPC1,TRAPPC8,PDRG1,PSMD4,INTS3,MED6,EIF2B3,SPC25,DYNC1I2,SPCS2,ZMAT2,IK,STX5,TUBGCP5,KIN,MPHOSPH10,MED14,ZNF830,GINS4,TRAPPC3,WDR74,YKT6,PMF1,MED28,MZT1,NUP88,NUF2,NUP214,STX18,RNF113A,WDR77,TUBGCP2,SART1,EIF4E,NELFB,TUBGCP3,RSL1D1,TIMM10,EIF2B5,G…	0.178331	0.002	0.0488	1.0|1.0|1.0|0.999999999999958|0.999999999999931|0.999999999999877|0.999999999999849|0.999999999999698|0.999999999999674|0.999999999999662|0.999999999999523|0.999999999999391|0.999999999999215|0.999999999999146|0.999999999997645|0.999999999997434|0.999999999997024|0.999999999996578|0.999999999995892|0.999999999995669|0.999999999993622|0.999999993202436|0.999999601632924|0.999996689627948|0.9999934…	84|84|84|98|107|114|119|131|134|137|142|150|156|158|179|184|188|190|198|199|202|209|213|221|229|233|235|237|243|248|252|257|268|274|275|280|282|288|292|301|308|312|314|320|321|323|333|337|339|346|347|350|363|365|375|390|394|398|399|403|420|427|428|431|433|435|446|449|452|454|458|462|463|468|470|471|474|481|484|492|494|495|499|505|508|518|544|545|552|553|568|571|573|578|586|590|591|592|594|600|604…	T47D_BREAST
HOST:51	BUD31,ERH,PHF5A,POLR2H,SF3B5,SPC24,NACA,MED20,MED17,HAUS8,HAUS1,HAUS4,GTF2A2,RPS21,HAUS3,HAUS5,CAPZB,ARPC3,MRPL41,NOP10,HAUS7,PSMG4,MRPL57,ARPC4,CDC26,SKA2,TAF1D,GEMIN7,LIN52,HAUS2,BMF,ATG101,ARPC2,MRPS34,COPS9,DDA1,TPRKB,MAGOH,ANAPC13,CTC1,DDIT3,TMEM249,LAMTOR1,MMGT1,NDUFA1,RNASEH2C,MRPS33,GOLGA7,TCAP,CENPO,TNP1,FANCF,GON7,BAG2,GTF2H5,PBXIP1,CCDC103,BORCS8,ACD,MREG,AHSP,BEX1,BORCS7,INIP,TNP2,DCA…	0.024982	0.002	0.0475	1.0|1.0|1.0|1.0|1.0|1.0|0.999814175003691|0.999623696861716|0.999530243531035|0.998606387376184|0.99798544266756|0.994595393211541|0.991385407764238|0.989517049885376|0.98339488482652|0.978765178866718|0.969435600535269|0.962748418535577|0.958033321393605|0.951382691919459|0.936798100632039|0.934595329905607|0.899857552023723|0.89552269003788|0.89041359125279|0.843970436378974|0.828489940580844|0…	262|262|262|262|262|262|358|374|381|415|426|472|495|510|540|562|631|677|703|732|754|761|849|857|862|933|955|961|1002|1077|1165|1176|1214|1228|1462|1516|1519|1547|1572|1623|1624|1674|1698|1787|1843|1958|1974|1986|2013|2129|2131|2140|2208|2249|2258|2283|2315|2350|2367|2520|2610|2701|2795|2800|2842|2914|2945|3033|3070|3079|3139|3163|3171|3220|3277|3300|3333|3353|3473|3658|3679|3801|3826|3836|3864|39…	CAL120_BREAST
HOST:57	RPL13,RPL14,RPL19,RPL21,RPL23A,RPL27,RPL31,RPL6,RPS13,RPS15A,RPS18,RPS24,RPS29,RPS4X,RPS9,RPL36,RPL35,RPL24,RPL37A,RPL26,RPL37,RPL36AL,RPL26L1,RPL36A,RPL39L,RPL29,RPL39,RPS4Y1	0.076347	0.002	0.0475	1.0|1.0|1.0|1.0|1.0|1.0|1.0|1.0|1.0|1.0|1.0|1.0|1.0|1.0|1.0|0.999963552694158|0.99955494329736|0.999121607025392|0.99842296080106|0.998279028547371|0.99588864622946|0.955120085508288|0.913884199212172|0.883354840136435|0.005483561867506|0.0|0.0|0.0	262|262|262|262|262|262|262|262|262|262|262|262|262|262|262|322|379|397|419|422|456|718|814|876|4708|4968|4968|4968	CAL120_BREAST
HOST:57	RPL21,RPL31,RPS13,RPS29,RPS4X,RPL13,RPL27,RPS15A,RPS9,RPS18,RPL14,RPL19,RPL23A,RPL37A,RPS24,RPL6,RPL36,RPL35,RPL37,RPL26,RPL24,RPL36A,RPL36AL,RPL26L1,RPL39L,RPL29,RPL39,RPS4Y1	0.080885	0.002	0.0488	1.0|1.0|1.0|1.0|1.0|0.999999999999994|0.999999999999986|0.99999999999998|0.999999999999777|0.999999999999533|0.999999999998849|0.999999999998645|0.999999999998294|0.999999999998118|0.999999999996966|0.999999998334798|0.999999930534543|0.999992423721006|0.999304341289394|0.995673871319|0.981848894419513|0.968822866923541|0.940580763731653|0.912781912384404|0.0382532779436921|0.0|0.0|0.0	84|84|84|84|84|85|86|88|126|141|165|169|173|177|189|207|211|232|341|414|507|564|695|801|3330|4968|4968|4968	T47D_BREAST
HOST:64	PSMG3,PDCD7,LYRM4,SDHC,TOMM22,TRIAP1,COX7B,NDUFB3,CHCHD1,TMEM258,PTCD3,MRPL43,MRPL38,MRPL32,SDHD,UQCRB,LRPPRC,MRPL37,COX6A1,NDUFB9,MRPS36,NDUFS5,MRPS23,MRPS22,MRPL53,NDUFB7,MRPL51,COQ4,MRPL50,COX6B1,COX5A,NDUFB10,MRPL55,UQCRQ,MRPS27,MRPS31,NDUFA8,NDUFA5,MRPS25,MRPS15,NDUFB6,COX8A,COX6C,NDUFAF1,TOMM6,AURKAIP1,UQCR11,NDUFB4,MRPS24,GADD45GIP1,TIMM29,MRPL54,NDUFA4,MRPL47,COQ7,NDUFA6,MRPL40,NDUFB8,NDU…	0.057048	0.002	0.0475	0.999670102027482|0.997807918523794|0.970728704174605|0.963346848050653|0.947172380579094|0.933843194976619|0.909871715348236|0.90857199180861|0.896954714381444|0.886280487108632|0.876065355559767|0.862913161368662|0.852088063196764|0.83413357383784|0.827604242307965|0.819711236163421|0.817269411850451|0.810050210264611|0.791869605375063|0.786695151768269|0.761384504083861|0.757556939308782|0.748…	369|430|619|673|736|763|827|834|854|868|887|907|922|947|957|970|976|995|1016|1022|1053|1055|1063|1073|1090|1104|1112|1117|1127|1128|1150|1156|1174|1193|1198|1209|1237|1272|1307|1337|1378|1382|1388|1394|1395|1396|1405|1416|1418|1438|1443|1450|1451|1457|1483|1489|1507|1528|1599|1610|1615|1629|1668|1738|1749|1799|1834|1846|1865|1916|1957|2026|2028|2035|2099|2138|2145|2322|2489|2594|2666|2763|2980|29…	CAL120_BREAST
HOST:64	PSMG3,LYRM4,PDCD7,TOMM22,TRIAP1,TMEM258,NDUFB3,COX7B,TIMM29,CHCHD1,MRPS23,NDUFAF1,SDHC,PTCD3,NDUFB10,NDUFB9,MRPS31,LRPPRC,MRPL37,COQ4,MRPL53,MRPS26,MRPL50,MRPL43,UQCRQ,NDUFA4,MRPL55,MRPS22,MRPS27,COX7C,MRPS15,SDHD,COX6A1,AURKAIP1,COX5A,NDUFS5,MRPL38,MRPS25,UQCRB,COX6C,MRPS36,NDUFC2,MRPL32,UQCR11,NDUFA5,COX6B1,MRPL47,COX15,NDUFA2,MRPS24,COQ7,CNEP1R1,NDUFB2,NDUFA8,COX4I1,NDUFB1,NDUFA6,MRPL51,MRPL42…	0.05742	0.002	0.0488	0.997999497025876|0.995405108683234|0.983889986660328|0.961229090299967|0.950320521749495|0.929982293297677|0.9250733095678|0.881350685842091|0.880782983167886|0.878946724766131|0.878893673612609|0.875446969134457|0.870632109715423|0.864008038401646|0.85037516301402|0.834781706891199|0.796696301763264|0.768292409936437|0.747769799240061|0.738739009751281|0.719343624458505|0.716110433101129|0.7145…	379|416|493|597|652|739|761|888|889|894|895|901|909|922|954|980|1044|1092|1107|1118|1147|1152|1154|1156|1168|1169|1179|1185|1186|1188|1202|1211|1223|1225|1254|1273|1277|1296|1305|1320|1324|1346|1348|1370|1379|1382|1398|1404|1426|1441|1449|1452|1463|1483|1494|1496|1503|1517|1518|1525|1536|1600|1609|1656|1669|1766|1776|1784|1789|1859|1869|1902|1907|1973|2069|2092|2096|2146|2153|2156|2363|2467|2611|…	T47D_BREAST
HOST:106	POLR2D,POLR2F,PRIM1,SUPT6H,URI1,CDC73,EIF2S2,EIF3D,CCNK,TIPIN,PPP1R8,NPLOC4,CRCP,NFYB,TAF12,PPP4R2,PRPF18,NPM1,PNN,ZC3H13,CLNS1A,ZMAT5,ZFC3H1,BCLAF1,TAF7,DR1,HTATSF1,HYPK,BTF3,TAF8,EAF1,SNUPN,BPTF,LIN9,GEMIN6,MEAF6,DRAP1,POLR3D,GTF3C6,THG1L,CHTF8,ZNHIT6,POLR1D,TAF11,ARID4B,THRAP3,TAF13,CCNT2,ATG3,TRIP4,INTS12,SUPT3H,DPY30,BAZ1B,NECAP1,BAHD1,POLE3,FRG1,NCBP3,KMT2B,PRKAB1,CCNT1,CENPS,SLF2,NEMF,TAF9…	0.04902	0.002	0.0475	1.0|1.0|1.0|1.0|1.0|0.99999949598766|0.999987620567783|0.999974075036327|0.999944160602675|0.999664422348856|0.998872890200965|0.996023899772173|0.981366231608102|0.976051370994662|0.973876645714156|0.973430817629546|0.965475886923416|0.963191750907202|0.959371136916925|0.957697672807968|0.95609450756112|0.952227572526449|0.951235542286254|0.94558711306606|0.93805086626002|0.932868503830251|0.932…	262|262|262|262|262|283|305|313|331|371|407|452|550|575|588|591|663|674|695|705|715|730|734|738|752|765|769|796|809|833|870|892|923|926|1027|1030|1048|1069|1121|1148|1185|1284|1287|1368|1415|1429|1468|1498|1504|1691|1694|1714|1768|1784|1811|1823|1956|1960|2100|2120|2127|2137|2202|2207|2217|2226|2268|2327|2335|2429|2523|2642|2684|2709|2737|2759|2833|2998|3015|3059|3104|3132|3165|3223|3232|3242|324…	CAL120_BREAST
HOST:106	SUPT6H,POLR2D,PRIM1,EIF2S2,POLR2F,CRCP,CCNK,CLNS1A,CDC73,TIPIN,EIF3D,URI1,PPP1R8,ZMAT5,HYPK,HTATSF1,PPP4R2,NPLOC4,THG1L,BPTF,PNN,SNUPN,NPM1,TAF8,DR1,TAF7,CHTF8,PRPF18,INTS12,TAF12,BTF3,ZNHIT6,NFYB,BCLAF1,BAZ1B,DRAP1,POLE3,ZC3H13,POLR1D,EAF1,GTF3C6,GEMIN6,POLR3D,DPY30,TAF13,CENPS,MEAF6,ARID4B,ZFC3H1,THRAP3,NEMF,CCNT2,KMT2B,KDM6B,EHBP1L1,LIN9,NDUFA12,NECAP2,SLF2,CCDC47,TAF9,NCBP3,CCNT1,TAF7L,PPP1R1…	0.037977	0.002	0.0488	0.999999999999951|0.99999999999987|0.999999999999158|0.999999999988823|0.999993466641859|0.999975437396616|0.999960744691866|0.999955343402016|0.999464026670528|0.998048479263313|0.995697719350838|0.993227095941316|0.991115394286091|0.987234231267382|0.981014486987801|0.974939778702168|0.968884008880434|0.967767046783118|0.964071557871919|0.948273423805125|0.946948178439941|0.944967457771537|0.92…	100|116|157|204|228|256|271|273|334|378|413|442|460|477|513|534|563|569|584|667|672|681|754|764|791|800|805|839|880|884|919|1020|1025|1027|1079|1104|1131|1150|1159|1178|1228|1232|1252|1262|1264|1283|1420|1466|1586|1723|1851|1854|1856|1874|1905|1964|2062|2113|2119|2158|2176|2187|2374|2380|2400|2413|2550|2567|2586|2610|2631|2783|2784|2804|2815|2954|2971|2976|2984|2986|2987|3087|3132|3261|3284|3506|…	T47D_BREAST
HOST:141	NUDT21,RPL11,RPL13A,RPL15,RPL18A,RPL23,RPL27A,RPL3,RPL32,RPL4,RPL5,RPL8,RPS11,RPS12,RPS15,RPS16,RPS20,RPS23,RPS6,RPS8,SNU13,RPS5,RPL18,RPL7,ATP6V1F,EIF6,RPL38,NIP7,SRP19,NSA2,IMP4,RPL35A,RPL30,SRP14,FXN,MRPS21,RPL10,MRPS5,RPF1,NHP2,UQCRFS1,FDX2,POP4,MRPL27,MRPL21,RPL22,MRPS10,MRPL4,MRPS14,MRPL49,NDUFAB1,MRPS18A,RPL28,MRPS35,MRPL10,EIF5AL1,MRPS11,EIF5A,MRPL30,MRPL14,MRPL9,MRPL3,COX11,CKS2,MRPS16,M…	0.218382	0.002	0.0475	1.0|1.0|1.0|1.0|1.0|1.0|1.0|1.0|1.0|1.0|1.0|1.0|1.0|1.0|1.0|1.0|1.0|1.0|1.0|1.0|1.0|0.999999999996928|0.999999982717526|0.99995739132199|0.999829699272333|0.999778724806768|0.998882506876435|0.995039144813859|0.99352046108103|0.990577299843715|0.98562984478982|0.974985146417607|0.971094688524771|0.967936373647025|0.962175054372542|0.958242273835446|0.95705528085686|0.954691666258459|0.94417124797…	262|262|262|262|262|262|262|262|262|262|262|262|262|262|262|262|262|262|262|262|262|267|281|324|356|363|406|466|485|502|528|581|614|646|682|702|709|719|742|759|777|806|872|920|925|928|931|942|950|994|1010|1024|1029|1035|1056|1062|1065|1076|1096|1103|1120|1141|1153|1157|1158|1169|1173|1190|1195|1201|1205|1216|1288|1295|1301|1302|1313|1325|1340|1379|1387|1391|1408|1458|1476|1500|1514|1549|1553|1604…	CAL120_BREAST
HOST:141	RPL11,RPL15,RPL18A,RPL23,RPL27A,RPL32,RPL4,RPL5,RPL8,RPS12,RPS20,RPS6,SNU13,RPS8,NUDT21,RPS11,RPS16,NIP7,RPS15,RPS23,RPL3,RPL13A,RPL7,RPL18,EIF6,RPS5,RPL38,NSA2,RPL35A,SRP19,RPL30,MRPL10,RPL28,RPL10,ATP6V1F,FXN,SRP14,IMP4,NDUFAB1,NHP2,MRPS5,MRPS21,POP4,FDX2,RPF1,RPL22,MRPL21,MRPS14,SUPT4H1,CKS2,MRPL27,MRPL49,MRPS18A,MRPL14,MRPS11,MRPL12,RPP38,MRPS35,EIF5A,UQCRFS1,MRPS16,MRPS6,MRPL17,MRPL2,COX5B,M…	0.235201	0.002	0.0488	1.0|1.0|1.0|1.0|1.0|1.0|1.0|1.0|1.0|1.0|1.0|1.0|1.0|0.999999999999959|0.999999999999944|0.99999999999994|0.999999999999575|0.999999999998833|0.999999999998767|0.999997118038899|0.999996754322368|0.999993681077904|0.999965374927377|0.999865112631002|0.999457174327861|0.998829764364708|0.997577108418644|0.9948310825964|0.994617241512865|0.993194608295325|0.98565276845946|0.971342192458607|0.9610218…	84|84|84|84|84|84|84|84|84|84|84|84|84|97|104|105|140|166|168|218|220|227|267|293|335|353|388|424|425|443|482|554|599|632|633|636|662|677|692|711|712|716|810|843|866|890|897|917|921|940|960|976|1013|1029|1059|1065|1069|1075|1089|1108|1151|1162|1171|1183|1195|1201|1217|1227|1240|1259|1263|1278|1290|1306|1311|1329|1331|1345|1364|1369|1394|1400|1409|1415|1427|1431|1459|1512|1526|1591|1592|1601|1652|…	T47D_BREAST
HOST:149	EIF2B3,IK,KIN,MFAP1,MPHOSPH10,RPS7,SF3A3,SLU7,SNW1,DYNC1I2,ZNF830,EIF4E,WDR74,PRPF3,SART1,RNF113A,SMG5,CDC37,ZMAT2,LUC7L3,ISY1,IMP3,MAK16,SMNDC1,EIF2B5,GEMIN5,PPWD1,ATP6V1D,WDR77,TOP1,RTF1,PWP2,BYSL,AATF,PPAN,POP5,EBNA1BP2,WDR3,FTSJ3,GNL3L,UTP11,ABT1,NOL10,UTP4,TOMM20,BMS1,LTV1,RPP30,RRP15,MRPL45,PES1,WDR46,TIMM44,RPP14,TBL3,RRP9,TSR1,NOP14,NUP43,FIS1,GTF2F1,UTP18,RBBP5,RRS1,SYF2,WDR36,TNNT2,UTP3…	0.071526	0.002	0.0475	1.0|1.0|1.0|1.0|1.0|1.0|1.0|1.0|1.0|0.999999983280794|0.999990313063176|0.999969265392345|0.999890099753063|0.999884557747397|0.999881275892238|0.99985348521334|0.999813865168125|0.999463127846929|0.999156741058282|0.999012186459604|0.998951720528937|0.998761898077005|0.998023804894605|0.997697984830036|0.996857111005644|0.996766737277127|0.996246955124878|0.995409061618886|0.993050943158138|0.99…	262|262|262|262|262|262|262|262|262|280|302|320|344|346|347|349|359|383|394|402|404|410|425|431|442|445|449|461|487|504|519|534|547|573|584|594|606|622|632|642|645|665|671|706|713|735|744|748|751|758|770|783|785|794|795|801|812|820|821|828|842|856|859|865|914|937|946|949|991|999|1015|1018|1019|1074|1084|1115|1125|1147|1166|1257|1259|1264|1269|1286|1315|1367|1440|1442|1460|1463|1484|1486|1532|1537…	CAL120_BREAST
HOST:149	SF3A3,PPWD1,RPS7,LUC7L3,MFAP1,IMP3,SLU7,SNW1,EIF2B3,DYNC1I2,ZMAT2,IK,KIN,MPHOSPH10,ZNF830,WDR74,RNF113A,WDR77,SART1,EIF4E,EIF2B5,GEMIN5,PRPF3,ISY1,BYSL,WDR46,MAK16,UTP4,NOL10,PWP2,RTF1,SMNDC1,PPAN,RPP30,POP5,GNL3L,TOP1,SMG5,WDR3,CDC37,FTSJ3,UTP11,BMS1,TSR1,PES1,RRP15,NOP14,UTP18,SYF2,TOMM20,LTV1,EBNA1BP2,AATF,ATP6V1D,TBL3,RPP14,EIF3J,NUP43,MRPL45,RRS1,POP7,RBBP5,RRP9,WDR36,CWF19L2,ABT1,CD2BP2,RPP…	0.081572	0.002	0.0488	0.999999999999931|0.999999999999877|0.999999999999215|0.999999999997024|0.999999999993622|0.999999993202436|0.999999601632924|0.999996689627948|0.999974463336009|0.999954926133411|0.99994251562541|0.999931414807857|0.999816882754667|0.999773284140322|0.999706278501906|0.999607089683089|0.99814322325955|0.997473039050809|0.996941001506508|0.996932555949862|0.993995741297586|0.993906441443366|0.992…	107|114|156|188|202|209|213|221|257|274|280|282|301|308|314|323|375|390|398|399|431|433|449|454|468|471|494|495|505|508|553|568|573|578|586|606|629|630|635|639|641|642|676|684|685|687|688|727|753|784|814|826|831|832|834|850|855|856|858|860|877|885|906|932|946|959|963|1000|1016|1041|1052|1057|1129|1153|1157|1167|1173|1213|1229|1236|1260|1271|1274|1282|1288|1317|1339|1340|1344|1347|1375|1416|1418|1…	T47D_BREAST
HOST:169	ANAPC5,CLTC,COPA,COPB2,CRNKL1,DDB1,EIF3A,ETF1,NAPA,PHB2,PRPF6,PSMD3,PSMD6,RPS19,RPSA,SART3,SF3B1,SF3B3,SSRP1,SUPT16H,VPS25,XAB2,ATP6V1G1,POLR3F,ATP6V1E1,PSMD11,SNF8,GTF2F2,PSMD8,PSMD12,POLR3C,RABGGTA,RPS10,ATP6V0D1,GPS1,SRP72,COPS2,COPS8,CTR9,PSMD13,COPS3,SRP68,EIF3E,UTP6,PCID2,SUGT1,COPS4,FNTA,CPSF1,NAA15,VPS18,PA2G4,NAA25,EIF3M,VPS36,COPE,GTF2H4,PRPF39,NSMCE2,CACYBP,MAEA,GTF3C3,VPS33A,MAU2,VPS1…	0.151744	0.002	0.0475	1.0|1.0|1.0|1.0|1.0|1.0|1.0|1.0|1.0|1.0|1.0|1.0|1.0|1.0|1.0|1.0|1.0|1.0|1.0|1.0|1.0|1.0|0.999999999988832|0.99999998351121|0.999999983504736|0.999995613823173|0.999988515035674|0.999986397801807|0.999983390278462|0.99983984666215|0.999684779783482|0.998985156658297|0.99767907459218|0.996372406324197|0.995300402771998|0.990838414434905|0.986770618808015|0.984102198776997|0.980969921604738|0.975854…	262|262|262|262|262|262|262|262|262|262|262|262|262|262|262|262|262|262|262|262|262|262|268|278|279|294|303|307|309|354|368|403|432|448|463|500|523|536|552|576|577|599|602|615|628|657|698|716|723|805|861|913|917|924|934|943|988|1049|1051|1085|1152|1226|1263|1318|1333|1360|1392|1414|1417|1434|1446|1472|1487|1510|1641|1647|1671|1765|1780|1840|1875|1891|1896|2019|2107|2189|2195|2235|2241|2340|2615|2…	CAL120_BREAST
HOST:169	ETF1,RPS19,VPS25,COPB2,XAB2,COPA,SF3B3,PHB2,NAPA,CRNKL1,PSMD6,SART3,RPSA,SUPT16H,PSMD12,PSMD3,SF3B1,PSMD11,DDB1,ANAPC5,COPE,PRPF6,CLTC,POLR3C,GTF2F2,POLR3F,EIF3A,RABGGTA,SSRP1,RPS10,PSMD8,FNTA,COPS8,ATP6V1E1,CTR9,CPSF1,PSMD13,SRP72,NAA15,COPS2,GPS1,EIF3M,EIF3E,COPS4,COPS3,GTF2H4,SUGT1,UTP6,NAPG,SRP68,PA2G4,ATP6V0D1,PCID2,NSMCE1,SNF8,GTF3C3,VPS33A,ATP6V1G1,PRPF39,GET4,NAA25,VPS41,VPS29,MAU2,PTGES3…	0.145112	0.002	0.0488	1.0|1.0|1.0|0.999999999999944|0.999999999999888|0.999999999999818|0.999999999999801|0.999999999999769|0.999999999999639|0.999999999999426|0.99999999999931|0.999999999995905|0.999999999994891|0.999998181400945|0.999996291541319|0.999987865789228|0.999985949780914|0.999983752508085|0.99997091284232|0.999967657486753|0.999863336771626|0.999808802652174|0.999705463001322|0.999090050170876|0.998730230…	84|84|84|104|112|120|122|127|139|147|154|197|200|217|224|238|242|246|262|264|294|302|315|349|357|373|389|391|407|429|456|485|537|541|558|579|583|598|601|602|611|626|644|656|699|744|748|750|770|777|817|864|883|893|953|964|1008|1048|1076|1098|1102|1117|1122|1155|1176|1192|1294|1386|1444|1451|1484|1731|1763|1910|2018|2188|2229|2252|2260|2315|2381|2397|2459|2598|2654|2730|2798|2914|2915|2948|2975|298…	T47D_BREAST
HOST:188	PMPCA,PMPCB,DNAJC17,PAM16,TOMM40,VDAC1,DNAJC9,UQCRC1,SAMM50,VDAC2,DNAJC19,UQCRC2,DNAJC11,TOMM40L,VDAC3,SEC11A,DNAJC15,SEC11C,IMMP2L,IMMP1L	0.02108	0.002	0.0475	1.0|1.0|0.999951034727419|0.994014748619874|0.993877292106896|0.973027797168072|0.840365209185322|0.698922968661479|0.556956022499756|0.481299003204596|0.416882427154619|0.391939486837449|0.367910287946553|0.319981205381999|0.181209879524246|0.118288674430032|0.104495382643812|0.0683522366312442|0.0280755423101455|0.0241181325146515	262|262|328|481|482|595|940|1129|1321|1409|1503|1545|1589|1673|2063|2472|2607|3050|3997|4119	CAL120_BREAST
HOST:188	PMPCB,PAM16,DNAJC9,TOMM40,PMPCA,DNAJC17,VDAC1,SAMM50,DNAJC11,VDAC2,UQCRC1,UQCRC2,DNAJC19,VDAC3,TOMM40L,IMMP2L,SEC11A,IMMP1L,DNAJC15,SEC11C	0.024345	0.002	0.0488	0.999975625760783|0.999849794610181|0.998349190737062|0.997729384073838|0.996176887973033|0.994550455844916|0.915804839771961|0.785448202951807|0.746736304207125|0.630351486694692|0.62425606768611|0.609162732523023|0.260021827063505|0.193119803125132|0.115770414626968|0.0564945662730997|0.0544499630864707|0.0328231865805154|0.0237302658517909|0.0040991567642002	255|297|372|384|408|426|793|1063|1110|1234|1243|1257|1687|1866|2258|2926|2968|3495|3846|4700	T47D_BREAST
HOST:202	CWC22,PRPF38A,PRPF38B,RBM8A,SRSF2,SRSF1,SNRNP27,SNRNP70,RBMX,SNRNP35,EIF3G,SRRM1,RBMXL1,RNPS1,SSB,TRA2B,ZCRB1,SRRM2,SREK1,TRA2A	0.090855	0.002	0.0475	1.0|1.0|1.0|1.0|1.0|0.999999577099412|0.999995408551618|0.99981815938002|0.999719783693346|0.999387213439719|0.998862090290897|0.998427706310892|0.990118106087222|0.980944423934233|0.967211929786694|0.811135318377697|0.50672655592769|0.0890129535530339|0.0493955171948945|0.0131306813267269	262|262|262|262|262|282|295|357|365|386|408|418|506|553|647|992|1374|2770|3428|4491	CAL120_BREAST
HOST:202	PRPF38A,SRSF2,RBM8A,CWC22,PRPF38B,SRSF1,RBMX,SNRNP35,SNRNP70,SNRNP27,SRRM1,RNPS1,EIF3G,RBMXL1,SSB,ZCRB1,SRRM2,TRA2B,SREK1,TRA2A	0.10237	0.002	0.0488	1.0|1.0|0.999999999997356|0.999886217790814|0.99984125675457|0.999769734793923|0.998124312264082|0.994171617993477|0.993433181065648|0.992972228340077|0.977317487192839|0.97555543851746|0.95314285266439|0.942383219666754|0.941686791499268|0.783013889017033|0.598649365130284|0.400357101091871|0.169319783157642|0.0977914163961845	84|84|185|290|298|309|376|430|440|445|525|532|647|689|693|1073|1265|1488|1955|2394	T47D_BREAST
HOST:205	GINS1,POLD3,GINS2,RBM17,MED31,RSL1D1,GINS4,TFIP11,GINS3,HMGA1,NOLC1,ORC2,HMGA2,XPC,HP1BP3,DEK	0.015546	0.002	0.0475	1.0|1.0|0.99955440313442|0.995822791699109|0.993753704092418|0.989912704827243|0.988063482424186|0.974583278970069|0.966171374088563|0.938647740176096|0.768924131127997|0.572650960602079|0.0852699557240292|0.066319601413292|0.0333462271548843|0.0231496504475481	262|262|380|457|483|508|517|582|656|750|1039|1304|2808|3093|3832|4143	CAL120_BREAST
HOST:213	UBE2I,UBE2L3,TSG101,UBE2C,YEATS4,UBE2S,UBE2N,UBE2V1,UBE2J2,UBE2V2,UBE2L6	0.013949	0.002	0.0488	0.999419412836149|0.995229123814971|0.982423032764111|0.972329917848371|0.937880682619814|0.901714904335822|0.889034589347285|0.783443432517736|0.383651187025245|0.157692525203071|0.0221201517450154	336|419|502|548|707|841|874|1072|1509|2004|3903	T47D_BREAST
HOST:214	ZRSR2,RBMX2,PDCD11,BUD13,CWC25,CIR1,CCDC9,UPF3A,NSRP1,FBF1,UPF3B,ZCCHC17,RP9,AKAP17A,CEP164	0.014129	0.002	0.0488	0.987587301785354|0.974604094432766|0.934257710466972|0.854147215330574|0.775344123758774|0.719840337449489|0.686061635194465|0.624602219065715|0.579057556141118|0.203339918895123|0.111063042769682|0.0785937703460343|0.0677864555872092|0.0205080265850245|0.003750623932548	472|536|720|947|1083|1145|1189|1242|1279|1837|2290|2589|2743|3980|4711	T47D_BREAST
HOST:216	PRPF19,EIF3I,BUB3,RAE1,WDR12,PRPF4,MLST8,CDC40,PLRG1,WDR61,TAF5,SNRNP40,STRAP,TAF5L,KATNB1,WDR83,ATG16L1,DCAF13	0.025633	0.002	0.0488	1.0|0.999966083332193|0.999849838499547|0.997622508247161|0.983584210661181|0.979204615803634|0.974308762362826|0.933352512413493|0.922562063907168|0.917062257474304|0.891955242692088|0.890495271311367|0.830320772236701|0.574594457192872|0.524402461308836|0.486498087569091|0.13419550826551|0.0315642757642306	84|266|296|386|496|517|538|724|772|790|863|870|987|1284|1338|1388|2120|3537	T47D_BREAST
HOST:307	CCT2,CCT3,CCT4,CCT6A,HSPD1,TCP1,CCT5,CCT7,CCT8,CCT6B	0.04676	0.002	0.0475	1.0|1.0|1.0|1.0|1.0|1.0|0.99997216239145|0.999690211240353|0.999521474370537|0.193676716530497	262|262|262|262|262|262|316|367|382|2025	CAL120_BREAST
HOST:319	CDK1,CDK7,CDK2,CDK9,CDK4,CDK3,CDK6,CDK5	0.009141	0.002	0.0475	1.0|0.999743598740015|0.995963626068587|0.969975266910521|0.388178314833486|0.101046912306861|0.0590874820421467|0.0360445631429867	262|364|454|627|1551|2651|3222|3752	CAL120_BREAST
HOST:351	HNRNPC,SF3A2,SFPQ,RBM14,CPSF6,WDR33,PPP1R10,RBBP6,PCF11,ALYREF,SNIP1,EIF4B,SRRT,NELFE,WAC,RBM15,RBM12,RPRD2,AHNAK,CPSF7,NONO,RBM15B,CSTF2T,EIF4H,CSTF2,AKAP8L,SCAF8,ZNF326,TTN,RALY,SPEN,TNRC6A	0.011821	0.002	0.0475	1.0|1.0|1.0|0.999999999999996|0.99971256792423|0.998390244390727|0.99764892574657|0.996829890876641|0.976734979281404|0.975254906379315|0.968114673344979|0.945589321304389|0.921618181152331|0.764839246883237|0.684615071738317|0.590018664696884|0.570185412191045|0.542052967202668|0.432850319121107|0.409372173754817|0.164547691869958|0.163982382492046|0.147840102667893|0.142591130416389|0.139206228…	262|262|262|265|366|420|434|443|572|578|644|737|793|1044|1154|1280|1309|1338|1477|1512|2154|2158|2270|2309|2329|2470|2776|2885|3174|4025|4240|4326	CAL120_BREAST
HOST:363	DCTN5,DCTN6	0.012077	0.002	0.0488	0.999999999998121|0.926276379304688	176|756	T47D_BREAST
HOST:366	DHX16,SNRNP200,DDX41,DHX8,DDX23,DDX46,DDX6,DDX21,DHX38,DDX1	0.046986	0.002	0.0475	1.0|1.0|0.999999999999998|0.999971856777783|0.999380649994019|0.991549572095908|0.983834323632652|0.969016435206081|0.95849578009899|0.305008578837361	262|262|263|317|387|494|538|637|700|1707	CAL120_BREAST
HOST:366	SNRNP200,DDX41,DHX8,DHX16,DDX46,DDX23,DDX21,DDX6,DHX38,DDX1	0.044287	0.002	0.0488	1.0|0.999999999996401|0.999955842205291|0.999496234628792|0.986654098587702|0.968604873610471|0.962857465475671|0.924259238049114|0.918308279588422|0.412879854312746	84|192|272|329|479|565|589|767|788|1474	T47D_BREAST
HOST:379	POLR2D,POLR2F,PRIM1,SUPT6H,URI1,CDC73,EIF2S2,EIF3D,TIPIN,PPP1R8,NPLOC4,CRCP,PPP4R2,PRPF18,NPM1,CLNS1A,ZMAT5,TAF7,BTF3,EAF1,SNUPN,BPTF,LIN9,GEMIN6,MEAF6,POLR3D,GTF3C6,THG1L,CHTF8,ZNHIT6,ATG3,TRIP4,DPY30,BAZ1B,FRG1,NEMF,NDUFA12,CCDC47,EAF2,RSPH4A,BAZ1A,SUB1,RSF1,LIG4,IFT46,TAF7L,CSTA,MKRN3,CAT,DNAJC28,ZCCHC8	0.037234	0.002	0.0475	1.0|1.0|1.0|1.0|1.0|0.99999949598766|0.999987620567783|0.999974075036327|0.999664422348856|0.998872890200965|0.996023899772173|0.981366231608102|0.973430817629546|0.965475886923416|0.963191750907202|0.95609450756112|0.952227572526449|0.93805086626002|0.916086703107888|0.885794707004907|0.870762863094027|0.851126065126781|0.84985713526146|0.78140860772979|0.780643551227326|0.745664084742578|0.7046…	262|262|262|262|262|283|305|313|371|407|452|550|591|663|674|715|730|752|809|870|892|923|926|1027|1030|1069|1121|1148|1185|1284|1504|1691|1768|1784|1960|2217|2523|2642|2684|2709|2737|2998|3104|3295|3334|3685|3707|4042|4352|4660|4968	CAL120_BREAST
HOST:379	SUPT6H,POLR2D,PRIM1,EIF2S2,POLR2F,CRCP,CLNS1A,CDC73,TIPIN,EIF3D,URI1,PPP1R8,ZMAT5,PPP4R2,NPLOC4,THG1L,BPTF,SNUPN,NPM1,TAF7,CHTF8,PRPF18,BTF3,ZNHIT6,BAZ1B,EAF1,GTF3C6,GEMIN6,POLR3D,DPY30,MEAF6,NEMF,LIN9,NDUFA12,CCDC47,TAF7L,LIG4,ATG3,MKRN3,CSTA,FRG1,IFT46,TRIP4,CAT,SUB1,BAZ1A,RSF1,RSPH4A,EAF2,DNAJC28,ZCCHC8	0.039188	0.002	0.0488	0.999999999999951|0.99999999999987|0.999999999999158|0.999999999988823|0.999993466641859|0.999975437396616|0.999955343402016|0.999464026670528|0.998048479263313|0.995697719350838|0.993227095941316|0.991115394286091|0.987234231267382|0.968884008880434|0.967767046783118|0.964071557871919|0.948273423805125|0.944967457771537|0.926638093790299|0.913380647138598|0.911964849317058|0.902997118827457|0.86…	100|116|157|204|228|256|273|334|378|413|442|460|477|563|569|584|667|681|754|800|805|839|919|1020|1079|1178|1228|1232|1252|1262|1420|1851|1964|2062|2158|2380|2413|2631|2986|3087|3506|3552|3611|3867|4037|4049|4257|4298|4369|4489|4968	T47D_BREAST
HOST:387	PSMD7,EIF3F,COPS6,EIF3H,EMC9,EMC8,BRCC3	0.011081	0.002	0.0488	0.999999999999502|0.999832995891592|0.953157449671261|0.939306875525965|0.187422052751435|0.0533325503112452|0.0189801044708159	144|299|646|701|1890|2988|4050	T47D_BREAST
HOST:402	EXOSC6,EXOSC7,EXOSC8,EXOSC4,EXOSC5,PNPT1,EXOSC9	0.021259	0.002	0.0488	0.999637247684202|0.978092209841506|0.968232493359472|0.964285740677942|0.926323989508842|0.92591590132133|0.896016759726083	319|521|566|581|755|758|852	T47D_BREAST
HOST:450	EEF2,EFTUD2,GSPT1,EIF2S3,EFL1,EEFSEC,DRG1,GTPBP1,GSPT2	0.017788	0.002	0.0475	1.0|1.0|1.0|0.999992016204788|0.925168311034069|0.776146419859993|0.37945970782489|0.145739973809654|0.0482244471369044	262|262|262|296|788|1034|1563|2285|3457	CAL120_BREAST
HOST:450	EFTUD2,EEF2,GSPT1,EIF2S3,EFL1,EEFSEC,DRG1,GTPBP1,GSPT2	0.015519	0.002	0.0488	1.0|0.999999999999717|0.999999999999327|0.99876036025746|0.936078688874|0.56099835411968|0.436815885667548|0.0827802720178131|0.0133783782616769	84|130|153|356|714|1297|1446|2537|4295	T47D_BREAST
HOST:467	ACTR10,HYOU1,ACTR8,ACTR6,ACTR5,HSPH1	0.013501	0.002	0.0488	0.995098840973424|0.983356528887026|0.938402175576681|0.923747683185517|0.53271611805047|0.0050547861266498	422|498|702|768|1327|4664	T47D_BREAST
HOST:485	ATR,SMG1,THOC1,INTS1,HEATR1,INTS2,NELFB,GEMIN4,NELFCD,TEX10,GLMN,FANCI,FANCD2,FANCC,MED24,MED23,ATM,LTN1	0.009377	0.002	0.0475	0.999999999973334|0.999979874460074|0.994370864542808|0.987509077411141|0.983235685806174|0.978495278666153|0.917307591809199|0.856198975119583|0.735244231411892|0.532039247866322|0.51108839713548|0.343206730572826|0.326141566914322|0.316513109695459|0.298149544582544|0.20352301876752|0.079720749766633|0.0276720073006114	270|311|477|520|541|565|807|915|1083|1346|1371|1630|1661|1682|1729|1992|2873|4007	CAL120_BREAST
HOST:485	NELFB,ATR,SMG1,HEATR1,INTS1,THOC1,INTS2,NELFCD,TEX10,GEMIN4,FANCI,FANCD2,FANCC,MED24,LTN1,GLMN,ATM,MED23	0.012138	0.002	0.0488	0.996236145450962|0.985925163785809|0.983957568411766|0.961670383480733|0.959592139055517|0.9549530558632|0.939687155608821|0.937524726318609|0.84541224118845|0.80281510348888|0.558571334969347|0.341495014877147|0.339620756617451|0.304856146796904|0.277225510747872|0.131882263398286|0.0404521625436915|0.0026894989443222	403|481|492|594|607|638|698|710|965|1031|1299|1558|1560|1613|1650|2134|3276|4751	T47D_BREAST
HOST:502	DHX15,KIF11,KIF18A,KIF23,DHX9,DHX33,KIF14,KIF4A,TTF2,DHX29,BRIP1,DHX35,SHPRH,KIF27,SENP2,KIF15,BLM,ERCC6L2,KIF4B,KIF6,MX2,KIF24,KIF9,HLTF,SENP3	0.006991	0.002	0.0475	1.0|1.0|1.0|1.0|0.961261086692544|0.895317519898974|0.863732698662084|0.812459237046278|0.430470408955807|0.328374152033501|0.294920339559876|0.2460604776043|0.208403674825877|0.205249265697196|0.175933062586739|0.153538691292757|0.136005122846046|0.103043006279134|0.0496755522012295|0.0374236667515793|0.0280804543050482|0.0175588193554788|0.0149238953399136|0.0059878011263755|0.0	262|262|262|262|687|858|905|986|1481|1659|1736|1856|1977|1987|2090|2227|2355|2629|3419|3708|3996|4322|4421|4693|4968	CAL120_BREAST
HOST:537	ATP6V1A,MCM2,RPA2,SRP54,TOP2A,DNM2,MCM6,MCM4,MCM7,ATP6V1B2,MCM3,MCM5,TOP3A,DNM1L,DNM3,CLPX,DNM1,MSH2,MCM8,TOP3B,TOP2B,MCM9,MSH3,ATP6V1B1	0.040412	0.002	0.0475	1.0|1.0|1.0|1.0|0.999999999998334|0.999044670223426|0.997664068663785|0.997573587785986|0.996875900432524|0.995822157398299|0.974323711463686|0.966759686087568|0.918923823705688|0.855331820617638|0.360062003178278|0.30494192470445|0.243231100794666|0.201292012851921|0.111459736431418|0.094818503868054|0.0607432601572434|0.044227470476226|0.0394564136156403|0.0339637766955786	262|262|262|262|266|400|433|435|441|458|585|653|804|918|1603|1708|1866|1998|2542|2707|3185|3534|3653|3816	CAL120_BREAST
HOST:537	MCM2,RPA2,MCM7,SRP54,MCM6,TOP2A,MCM3,MCM4,MCM5,TOP3A,ATP6V1B2,ATP6V1A,DNM1L,DNM2,DNM3,CLPX,DNM1,MSH2,MCM8,TOP3B,ATP6V1B1,MSH3,TOP2B,MCM9	0.037989	0.002	0.0488	1.0|0.999999999999952|0.999999999999518|0.999999999999014|0.99999999999848|0.999999999997624|0.999999999983147|0.99962390777528|0.998634719314275|0.993756902579884|0.982728381261817|0.981871253680646|0.934949428473245|0.887798030820274|0.467436647397283|0.218821228785976|0.19511922654487|0.158521724638616|0.0419320020041519|0.0360314730752552|0.0174791047309475|0.013421712718993|0.008223673903381…	84|99|143|161|170|180|205|322|361|437|501|506|718|875|1413|1790|1860|2001|3243|3394|4116|4293|4522|4552	T47D_BREAST
HOST:542	MED6,MAD2L1,MED14,THOC5,SNAPC1,MAD2L2,POLR1E,GTF3C5,BCCIP,RAB3GAP1,AAR2	0.012977	0.002	0.0475	1.0|0.999991144160448|0.999958860120878|0.999940998097546|0.997954559130468|0.977984287180824|0.805082427171935|0.657747411706296|0.638562458774496|0.0398480522498833|0.005860941484401	262|298|323|332|427|568|1003|1187|1210|3642|4698	CAL120_BREAST
HOST:557	MRPL34,MRPL35,MRPL36	0.013286	0.002	0.0475	0.936652411934476|0.918924894518784|0.720506685518401	755|803|1098	CAL120_BREAST
HOST:582	CKAP5,INTS4,NCAPG,NCAPD2,TAF2,NOC4L,PIK3R4,NCAPG2,NCAPD3,PPP4R4	0.028664	0.002	0.0475	0.999997548283532|0.999971480161461|0.998082646264496|0.997849747833086|0.951237276701542|0.928385098701219|0.871375098050053|0.619191510545277|0.468788748300076|0.0209903172681999	290|318|424|429|733|776|891|1244|1423|4221	CAL120_BREAST
HOST:582	INTS4,NCAPG2,CKAP5,NCAPG,NCAPD2,NOC4L,NCAPD3,TAF2,PIK3R4,PPP4R4	0.034442	0.002	0.0488	0.999999999999976|0.999905253796647|0.999794489938567|0.999778413313941|0.998517099123313|0.975707229488358|0.972287733356|0.935050017982247|0.593742537869255|0.0222466643893372	90|287|304|306|367|531|551|717|1270|3896	T47D_BREAST
HOST:599	PRPF31,NOP58,NOP56,FEN1	0.01885	0.002	0.0488	0.999999999997556|0.99034439053624|0.970686131557912|0.915270697305473	181|464|556|795	T47D_BREAST
HOST:614	NUP62,NUP54,NUP98,NUP153,NUP58,NUP50,POM121C,POM121	0.010412	0.002	0.0488	0.929426131751184|0.918354979237711|0.853616320399264|0.844351234463436|0.823224667267421|0.682551618715232|0.604442794533488|0.236286581026975	740|787|948|967|998|1193|1261|1736	T47D_BREAST
HOST:619	RAD17,ORC3,ORC5,ORC4,CHTF18	0.012377	0.002	0.0475	0.973905081185051|0.747065603728359|0.68928237981928|0.625010654537269|0.448432780106741	587|1066|1146|1231|1456	CAL120_BREAST
HOST:634	PDRG1,PFDN2,PFDN6,UXT,PFDN5,PFDN1,VBP1,PFDN4	0.013914	0.002	0.0475	1.0|1.0|0.999973255175175|0.901187088375602|0.812038876433626|0.753799215689022|0.554728508862935|0.485719173970616	262|262|315|848|987|1058|1324|1401	CAL120_BREAST
HOST:651	POLD1,POLE,POLA1,POLRMT,POLG	0.019453	0.002	0.0475	1.0|1.0|0.986107659496171|0.708974749776029|0.526070412005721	262|262|526|1113|1356	CAL120_BREAST
HOST:651	POLE,POLD1,POLA1,POLRMT,POLG	0.016166	0.002	0.0488	0.999999999998774|0.999892130913231|0.957359857544622|0.721865564507287|0.256544620156562	167|289|628|1140|1693	T47D_BREAST
HOST:675	PSMC3,PSMC6,RUVBL1,RUVBL2,VCP,PSMC1,PSMC4,PSMC2,RAD51,VPS4A,PSMC5,NVL,AFG3L2,VPS4B,BCS1L,KATNAL1,KATNA1,KATNAL2,SPG7	0.053801	0.002	0.0475	1.0|1.0|1.0|1.0|1.0|0.999999991171239|0.999969747565625|0.999299202810964|0.999135224354484|0.995421569965713|0.994591998255933|0.994475294227047|0.979902037677882|0.568372015126942|0.411372436065189|0.0917674605178022|0.047465673109991|0.0237551977885277|0.0228042752171027	262|262|262|262|262|274|319|389|396|460|473|474|556|1314|1508|2738|3468|4128|4158	CAL120_BREAST
HOST:675	RUVBL1,VCP,PSMC6,PSMC3,RUVBL2,PSMC2,PSMC4,PSMC1,RAD51,NVL,PSMC5,AFG3L2,VPS4A,BCS1L,VPS4B,KATNAL1,KATNAL2,SPG7,KATNA1	0.037173	0.002	0.0488	1.0|1.0|0.999999999999671|0.99999999999744|0.999973170570578|0.997422119572314|0.997243581199248|0.993835698051462|0.984446266471634|0.965085212966193|0.958563592265203|0.928899570442648|0.487869321773888|0.414227147490003|0.0404710820261252|0.0149161500090681|0.0121636507757626|0.0105049439750762|0.0048810522040301	84|84|135|183|259|392|395|436|489|577|617|743|1384|1473|3275|4216|4351|4424|4671	T47D_BREAST
HOST:679	SPCS2,PMF1,MED22,BCAS2,SKA1,MED4,MED27,CCDC115,PSME1,GEMIN8,PSME2,MED7,PSME3,GMNN,BAG5,PTOV1,GOLGA7B,CAPZA2,DTNBP1,CAPZA1,BLOC1S5,PDCD10	0.008082	0.002	0.0488	0.999952936598865|0.999388240633638|0.979142178578058|0.973049847429452|0.960623208809439|0.928900907798069|0.890070258500727|0.836315277022333|0.814335448986943|0.783474711765948|0.687330274048468|0.572032360961391|0.526348031311852|0.498546253477937|0.164590570444776|0.120195421940473|0.0951468550950366|0.0863226485224301|0.0572453543814179|0.0538618641712531|0.0096978175871337|0.00197305412678…	275|337|518|545|600|742|872|977|1014|1071|1184|1287|1336|1371|1981|2206|2418|2500|2908|2978|4455|4761	T47D_BREAST
HOST:688	RAD51D,RAD51C,XRCC3,DAP3,ELP5,XRCC2,ELP6,RAD51B,ELP4,SWSAP1	0.021951	0.002	0.0475	0.970504679888735|0.927183489182377|0.867556484877312|0.819874817087067|0.745487208208609|0.683381482211438|0.655452519224583|0.630174673913617|0.476933474248363|0.050594837074976	621|780|897|969|1070|1155|1189|1223|1413|3395	CAL120_BREAST
HOST:688	RAD51C,XRCC3,ELP5,RAD51D,ELP6,XRCC2,ELP4,DAP3,RAD51B,SWSAP1	0.030718	0.002	0.0488	0.997878155698845|0.98339943059288|0.961564827733665|0.949432025310274|0.920733458368309|0.896004683226357|0.785503747326059|0.722657950236724|0.536860995059111|0.0156959395216482	380|497|595|660|779|853|1062|1139|1321|4177	T47D_BREAST
HOST:702	RFC3,RFC5,RFC2,RFC4	0.020834	0.002	0.0475	1.0|0.999999992880467|0.99999998399218|0.969298496081471	262|273|277|634	CAL120_BREAST
HOST:702	RFC3,RFC5,RFC2,RFC4	0.018809	0.002	0.0488	0.999532953101374|0.981542132197098|0.977446674122299|0.91436394689159	326|509|524|796	T47D_BREAST
HOST:756	MFAP1,SLU7,SNW1,ZMAT2,IK,RNF113A,SART1,SYF2,C9orf78,CWC15	0.009468	0.002	0.0488	0.999999999993622|0.999999601632924|0.999996689627948|0.99994251562541|0.999931414807857|0.99814322325955|0.996941001506508|0.926788179611796|0.715332166875136|0.0	202|213|221|280|282|375|398|753|1153|4968	T47D_BREAST
HOST:795	CACTIN,SF1,SF3A1,PRPF40A,TBP,SMARCE1,SUGP1,SARNP,RBM10,RBM5,WASHC2C,HCLS1,PRPF40B,WASHC2A	0.025618	0.002	0.0475	1.0|1.0|1.0|0.98099707351613|0.963849704309728|0.962915045702519|0.934615975923428|0.829053652806877|0.46445244863724|0.448935495894324|0.145367713244677|0.0789250459031919|0.0604853406748926|0.0	262|262|262|551|669|676|760|954|1432|1452|2294|2883|3193|4968	CAL120_BREAST
HOST:842	RPAP1,UTP20,TTI2,NOC2L,TTI1,MYBBP1A,PELP1,TELO2,NOP9,MMS19,GCN1,HTT,AP5Z1,PRKDC	0.025046	0.002	0.0475	1.0|0.998620224863522|0.956597808560287|0.939867054917119|0.932789214024361|0.926979343056701|0.91192882574756|0.832306449728667|0.744862111903885|0.62190047957828|0.278178979134271|0.123014941174467|0.0507435154949076|0.0	262|414|711|749|766|781|818|951|1072|1240|1767|2440|3386|4968	CAL120_BREAST
HOST:842	RPAP1,UTP20,PELP1,TTI1,TELO2,NOC2L,MMS19,MYBBP1A,NOP9,TTI2,GCN1,HTT,AP5Z1,PRKDC	0.030396	0.002	0.0488	0.999993134867024|0.995709614244752|0.963242176937457|0.949673622806453|0.919119280232697|0.911957786761837|0.899790321958287|0.893582142026816|0.875848676377328|0.868399083813112|0.661050193826838|0.0384500267302568|0.0242869152092312|0.0	230|412|588|658|783|806|848|857|900|914|1214|3323|3821|4968	T47D_BREAST
HOST:858	NAA50,NAA10,ELP3,NAA20,PRMT1,CYCS,DPM1,SDHA,UXS1,PCCA,MCCC1,MOCS1	0.012972	0.002	0.0488	0.999711869927514|0.972623187485197|0.912644209307123|0.909062742234806|0.908762276722323|0.826566256404167|0.668252231988593|0.346978809619722|0.256307896859516|0.0869828234791106|0.013113079799558|0.0	311|547|803|819|823|993|1206|1549|1695|2495|4306|4968	T47D_BREAST
HOST:861	GTF2E1,RAD21,SF3B2,WBP11,KANSL1,KANSL2,TAF1,ATXN7L3,EIF4G1,WNK1,CHTOP,WASF2,CEP170,MSL2,SUPT20H,EPC1,DROSHA,WASF3,TOB1,LEO1,EPC2,WASF1,PCM1,APBB1IP,INO80D,EIF4G3,KANSL1L,AKAP6,TAF1L,SYNPO2,LMO7,HIPK2,WASHC1	0.014085	0.002	0.0475	1.0|1.0|1.0|0.999081809717999|0.992493910574827|0.959300429538902|0.952962084110416|0.877719039912263|0.82770549396126|0.822808332746243|0.793245505559443|0.538067522939433|0.409713166953053|0.403166250471511|0.376773512961005|0.278486084254651|0.245921275587184|0.182973949953019|0.174078468658871|0.137047856373149|0.135002364926956|0.127277298528057|0.082114634567169|0.0781496682187112|0.0688393…	262|262|262|399|491|696|722|885|956|966|1014|1342|1511|1522|1570|1766|1857|2058|2098|2347|2364|2409|2843|2887|3042|3848|4018|4542|4681|4723|4763|4968|4968	CAL120_BREAST
HOST:867	IMP3,PPWD1,BYSL,PPAN,FTSJ3,GNL3L,NOL10,BMS1,WDR46,TSR1,UTP18,RBBP5	0.018867	0.002	0.0475	0.998761898077005|0.996246955124878|0.981857343080812|0.974384015580368|0.969387262927573|0.968415706634561|0.96357888745764|0.950068828622858|0.925947450641944|0.914743850066874|0.895721447052866|0.894584695332661	410|449|547|584|632|642|671|735|783|812|856|859	CAL120_BREAST
