# Supplementary material for: A Graph Neural Network Approach for Hierarchical Mapping of Breast Cancer Protein Communities
Source: Research Square preprint supplement (doi:10.21203/rs.3.rs-4478708/v1), 2024-06-11
Supplement: Supplementary file 2 [file d05237287c95e9a6018d9246.xlsx]

## Sheet: ACS4931_Manuscript_Table_S2
System ID	Genes	Selection Pressure	p-value	q-value
HOST:2	RUNX1,TTN,PHKA2,FBXW7,RBM12,EIF4A2,NCL,TBL1XR1,HNRNPA2B1,RPTOR,MYH7,G3BP2,HCFC1,DDX5,FMR1,SIN3A,WAC,EEF1A1,RGS7,GJA5,ILF2,GJB3,EIF4A3,SUPT5H,AP1G2,EIF3I,PABPC3,NUP107,ACTG2,ACTG1,SMAD4,CELF2,ESR1,G3BP1,BCKDK,AP4M1,USP28,RBM15,HNRNPK,TRAF7,DCAF5,PCBP2,PPP2CB,XPO1,PPP2CA,AP3M1,ATP2A1,HSF1,PSMB5,CNOT6,FARSB,MYH8,RNF19A,EXOSC3,CPEB1,HADHB,SIX6,DCAF11,SMAD2,HRAS,DKC1,ATG16L1,RUNX2,PRPF4,FNTB,ELOF1,NDU…	0.011494	0.02	0.1418
HOST:10	PHKA2,RPTOR,FMR1,SIN3A,RGS7,SUPT5H,AP1G2,NUP107,SMAD4,BCKDK,USP28,XPO1,CNOT6,SMAD2,FNTB,COPG1,PHKA1,API5,STUB1,PSMD1,TCEA1,APEX1,NSFL1C,RAD23B,XPO5,SMAD3,AP3B1,SND1,CSDE1,COPG2,CNOT3,MORF4L1,PDK2,RABGGTB,STIP1,AP1B1,XPO6,XPO7,TFCP2,PSMD5,GGA1,KPNB1,KIFAP3,SMAD9,ADRM1,AGL,AP1G1,AP2A1,AP2A2,AP2B1,AP3B2,AP3D1,AP4B1,AP4E1,ATP6V1H,BIN1,CAB39,CAB39L,CAND1,CEBPZ,CNOT6L,CNOT9,COPB1,CTNNB1,CTNNBL1,DCAF1,E…	0.001488	0.03	0.2321
HOST:13	RUNX1,EIF4A2,HCFC1,DDX5,EIF4A3,PABPC3,ACTG2,ACTG1,CELF2,ESR1,AP4M1,HNRNPK,PCBP2,PPP2CB,PPP2CA,AP3M1,ATP2A1,HSF1,CPEB1,SIX6,RUNX2,ELOF1,RBM39,RARG,RFX3,UBE2D2,RPL26,NR1H2,PPARG,YPEL5,HNF1B,RPL12,ACTB,DDX17,AR,CAMK2D,AP3M2,PRPSAP2,RBMS1,HDLBP,RPL19,AP4S1,RPS27L,RPL37A,EIF4A1,RPL35,RPS15A,ELAVL1,RPS25,TLE3,NR4A2,RPS18,FUBP3,AP2S1,POLR2J,UBE2A,RPL23A,AP2M1,PMS2,RPL27,SIX1,PABPC4L,ACTA2,RPL9,UBE2B,RPL…	0.001698	0.03	0.2477
HOST:26	TP53,PIK3CA,CDH1,KMT2C,AKT1,PIK3R1,ERBB2,MYH9,AKAP9,CASP8,SF3B1,KMT2E,TAF1,SRCAP,ERBB3,KDM6A,CHD4,BACH2,CACNA1E,DMD,USH2A,TPR,GRID2,TAF1L,MAP1A,RANBP2,GRIN2A,LRP2,MYO18B,TLR7,CRNKL1,KIF17,KIF4A,ARHGAP29,TGS1,CPS1,TLR4,MYB,PRDM10,CDKN1B,MYO6,SCN10A,FCRL5,BAP1,NUP210L,MYO7B,CHRNB2,NOTCH2,ACVR2A,ACTN4,CUL4B,MYO10,WWP2,COL6A6,SP3,SCN11A,SMARCA4,ATP10B,FRMPD4,COL4A5,CDH20,PMS1,SGIP1,ACVR1B,KIF5B,FGFR2…	0.053293	0.02	0.1418
HOST:37	NCOR1,ARID4B,HTATSF1,MKRN3,BCLAF1,KRIT1,CDC73,THRAP3,ZCCHC8,TRDN,LARP7,CUL7,SOCS6,KMT2B,NXF5,RNPC3,MAVS,CCNT1,PPM1E,CDC5L,MTA2,BAX,RCOR2,APOBR,BAZ1B,DNAJC28,SMARCC2,RSPH4A,BCL10,POLR2F,CPSF4,NECAP1,FBXO21,SMTNL1,ZNHIT6,PAF1,POLR3GL,PIK3C2B,MAPK6,CCDC8,ZC3H13,EXD1,INTS12,POLR3G,MEAF6,SOCS4,BCL2L1,GEMIN6,PNN,UBAP1,TIPIN,KMT2A,PRKAB1,TAF12,POLE3,CARD8,LARP6,BTF3,RANBP3L,PPP4R2,GTF3C6,MTA3,PEX3,BAHD1…	0.004204	0.03	0.2321
HOST:45	TTN,RBM12,NCL,HNRNPA2B1,G3BP2,WAC,ILF2,G3BP1,RBM15,CSTF2T,SNRPC,TNRC6A,POLB,SEC24C,RBM14,SNRPN,HNRNPM,NXT2,RBM4B,SCAF8,HNRNPC,SNRPB,CIRBP,RALY,AHNAK,AKAP8L,ALYREF,ANXA2,CPSF6,CPSF7,CSTF2,DAZAP1,EIF4B,EIF4H,EYA1,EYA3,HNRNPA0,HNRNPA1,HNRNPA1L2,HNRNPA3,HNRNPAB,HNRNPD,ILF3,KHDRBS1,KHDRBS3,LSM14A,LSM14B,MYEF2,NELFE,NONO,NUTF2,NXT1,PCF11,PPP1R10,RBBP6,RBM15B,RBM3,RPRD2,SEC23A,SEC23B,SEC24A,SEC24B,SEC24…	0.002889	0.03	0.2321
HOST:69	BRCA2,BRCA1,NRIP1,ADNP,JMJD1C,MED1,MEN1,SLX4,PYHIN1,REV3L,MED13,ASXL2,RFX5,ASXL3,RBM44,DCAF17,MED13L,CRYBG3,AFTPH,MAP2,CEP192,XRCC1,BCOR,CNST,ENTHD1,PPARGC1B,RMI1,GPKOW,KDM3B,NSL1,TERF2IP,FAM186B,ERCC1,AIM2,RB1CC1,ATF7IP,GCM1,PPP1R15B,MDM4,AKAP4,BCL7A,ZBTB16,NCAPH,C2orf49,FANCB,MUS81,ELL3,APOF,DSN1,RNASEH2A,MIS12,LIN37,VEZT,APOL1,DYDC2,CENPJ,EME1,CT45A6,TANK,RPP40,HAUS6,ACIN1,AKAP5,AKAP7,ANAPC1,A…	0.00064	0.04	0.2477
HOST:82	BACH2,TFAP4,ATF6,NFE2L3,ERG,TOX4,MYF6,HEY2,HLF,SPI1,NFE2,ATF2,BATF3,MLLT10,ATF3,JUN,JDP2,ETV3,TCF21,BATF,MAX,MAFF,ATF4,ATF6B,ATF7,BACH1,CEBPG,CREB3,FOS,FOSL1,FOSL2,GATAD2A,GATAD2B,HES1,ID2,JUNB,JUND,MAFG,MAFK,MITF,MXD1,MXI1,MYC,MYF5,MYOD1,MYOG,NEUROD1,NFE2L2,NFIL3,NHLH2,NR3C1,NR3C2,PHF21A,SALL4,TAL1,TBX15,TBX18,TBX5,ZFHX3	0.001136	0.03	0.2321
HOST:83	GPS2,ZFP36L1,NPAS4,RB1,MAGED1,KMT2D,SHISA9,CBX8,CCNL2,LSR,CECR2,PRAM1,IRF9,ATXN2,ZFP36L2,ATF5,TEAD4,CNPPD1,TEAD1,KLF4,FLYWCH1,TEAD2,CAPRIN2,RBL1,CCNI2,NFATC4,NUFIP1,AEBP2,BRF2,CASC3,CBX2,CBX4,CBX6,CBX7,CCNA1,CCNA2,CCNB1,CCNB2,CCNC,CCND1,CCND2,CCND3,CCNE1,CCNE2,CCNF,CCNG1,CCNG2,CCNH,CCNI,CCNJ,CCNJL,CCNL1,CCNO,CCNY,CDK5R1,CDK5R2,CEBPA,CEBPB,CEBPD,CEBPE,DBP,ELL,ELL2,ELOA,FIP1L1,FOXO3,GLI1,GLI2,GLI3,…	0.001402	0.04	0.2477
HOST:107	CD19,IL11RA,IL4R,IL10RB,LEPR,IL3RA,CD4,IL27RA,SCN2B,IL6ST,LIFR,PIGR,CD40,IL2RB,IL12RB1,CSF3R,CD2,CSF2RA,SCN3B,OLR1,CTLA4,SERPINA5,CD8A,IZUMO1,TNFRSF11B,IL23R,CD200R1,CLEC12B,CD3G,TNFRSF1B,IL2RA,ESAM,CD28,CD79A,CATSPER1,CD3D,CD3E,CD69,CD79B,CD80,CD8B,CNTFR,CRLF1,CRLF2,CSF2RB,EBI3,F3,FAS,FCGR3A,GHR,GP1BA,IFNLR1,IL12B,IL12RB2,IL13RA1,IL13RA2,IL2RG,IL5RA,IL6R,OSMR,PECAM1,PKD1,PRLR,SCN1B,SCN4B,SERPINE…	0.001644	0.04	0.2477
HOST:129	PIK3CA,CDH1,AKT1,PIK3R1,ERBB2,MYH9,CASP8,ERBB3,KDM6A,CACNA1E,DMD,GRIN2A,KIF17,KIF4A,CPS1,MYB,MYO6,SCN10A,FCRL5,MYO7B,CHRNB2,ACTN4,CUL4B,MYO10,WWP2,SCN11A,CDH20,PMS1,KIF5B,FGFR2,KIF16B,KCNA1,DNM1,CDH12,DCHS1,DLG1,MCM7,EPHA5,MR1,PARP9,DNM3,KCNK2,LYN,SPTA1,RGS4,SAE1,KLHL13,ABCB8,KIF1A,SPTB,HSPD1,PDE4B,CFTR,MYH7B,KCND1,HNRNPH3,ACTL6B,HGS,MYO16,MCOLN1,SPOP,CNGA4,LDHC,SMC1B,GPSM2,CCT6B,LILRA4,HCN3,A1CF…	0.098225	0.02	0.1418
HOST:134	AKAP9,TPR,RANBP2,LRP2,TLR7,TGS1,TLR4,INTS8,IKBKB,RABEP1,WTAP,NEK10,FBXO33,CEP290,FBXO24,GRHPR,FBXL18,ODF2,RGPD3,SPECC1L,MEPCE,LRP5,CHUK,MAP3K5,SCLT1,MAP7,EEA1,RPA4,LRP6,TAF1A,DDX20,VLDLR,RIPK3,UGT3A2,VRK2,CCDC68,FBXO48,WDR93,RIPK1,GTF3C4,HPS3,RNF8,SNAP47,AIMP2,ALS2,AMHR2,ANAPC4,ASCC1,AZI2,CBR4,CCAR2,CD14,CEP128,CEP83,CFAP206,CGNL1,CHAF1A,CHMP7,CLIP2,CNTRL,COMMD1,CTU2,CUBN,DFFB,DTX3L,EIF2AK4,FANCG…	0.001951	0.03	0.2477
HOST:139	USH2A,GRID2,NUP210L,NOTCH2,COL6A6,ATP10B,PLXNA2,LAMA2,LAMB3,GBA3,COL12A1,ROR1,LAMC1,CRB1,NTRK1,ATP10D,TF,HCFC2,SDR16C5,METTL23,FBL,IL18R1,ATP1B4,COL14A1,PLXNA3,CACNA2D2,CAMKMT,RAD51C,MST1R,NAT9,CR1L,TNR,ATP8B3,NOX1,ITGB3,TMEM67,CR2,RELN,ABCC9,ITGA9,F11R,ITGB2,ELOVL6,MATN2,THBS1,ATP4B,ATP11A,NOMO2,SHOC2,ELP5,LZTR1,GANAB,ATP10A,EXT2,FAP,ATP8B2,TGM3,CACNA2D1,DNAL1,DECR1,NRP2,ITGA10,LRRC8C,ABHD6,COMP…	0.002728	0.04	0.2477
HOST:153	NUP160,TRAPPC9,STAG2,SUZ12,POM121,CAV1,NUP62,LDB2,STAT3,AHCTF1,STAG1,TRAPPC10,INTS6,NUP54,RAB3GAP2,NUP153,ARID2,ARFGEF1,MED16,SYMPK,DCTN4,RPA3,NOL11,STAT5A,STAG3,LDB1,DMXL2,TRAPPC8,XRCC6,ELMO1,PEX14,DET1,NUP98,THOC2,DEPDC5,AHI1,BABAM1,BBS1,BBS2,BBS7,BBS9,CAV2,CAV3,CFAP70,CHD8,DCAF15,DENND4C,DMXL1,DOCK1,EIF4G2,GTF2H2,GTF2H2C,GTF2H3,HPS5,INTS13,INTS14,INTS3,INTS6L,ITFG2,ITPR1,ITPR2,ITPR3,KPTN,MED25…	0.002128	0.03	0.2477
HOST:195	FMR1,SIN3A,RGS7,SUPT5H,SMAD4,SMAD2,SMAD3,SND1,CSDE1,CNOT3,MORF4L1,TFCP2,SMAD9,FXR1,FXR2,KRR1,MORF4L2,MSL3,SIN3B,SMAD1,SMAD5,SMARCD1,SMARCD2,SMARCD3	0.003694	0.03	0.2321
HOST:202	TRA2B,PRPF38B,RBM8A,RBMXL1,SRSF2,TRA2A,CWC22,RNPS1,SNRNP35,SRRM2,PRPF38A,EIF3G,RBMX,SNRNP27,SNRNP70,SREK1,SRRM1,SRSF1,SSB,ZCRB1	0.001313	0.04	0.2477
HOST:220	BRCA2,BRCA1,NRIP1,ADNP,JMJD1C,MED1,MEN1,SLX4,PYHIN1,REV3L,MED13,ASXL2,RFX5,ASXL3,RBM44,DCAF17,MED13L,CRYBG3,AFTPH,MAP2,CEP192,XRCC1,BCOR,CNST,ENTHD1,PPARGC1B,RMI1,GPKOW,KDM3B,NSL1,TERF2IP,FAM186B,ERCC1,AIM2,RB1CC1,ATF7IP,GCM1,PPP1R15B,MDM4,AKAP4,BCL7A,ZBTB16,NCAPH,C2orf49,FANCB,MUS81,ELL3,APOF,DSN1,RNASEH2A,MIS12,LIN37,VEZT,APOL1,DYDC2,CENPJ,EME1,CT45A6,TANK,RPP40,HAUS6,ACIN1,AKAP5,AKAP7,ANAPC1,A…	0.167341	0.02	0.1418
HOST:224	ACTG2,ACTG1,PPP2CB,PPP2CA,ACTB,ACTA2,ACTA1,ACTC1,PPP1CA,PPP1CB,PPP1CC	0.002707	0.03	0.2321
HOST:228	ACVR2A,ACVR1B,ACVRL1,TGFBR1,ACVR1,ACVR1C,ACVR2B,BMPR1A,BMPR1B,TGFBR2	0.001627	0.03	0.2321
HOST:259	ATP10B,ATP10D,ATP8B3,ATP10A	0.010477	0.02	0.1418
HOST:270	ARID1A,ARID1B,BCL9,SS18,NCOA6,CITED2,BCL9L,CBLL1,DAZAP2,EP400,MAML1,PYGO2,SAP130,SS18L1	0.007887	0.02	0.1418
HOST:271	MYO18B,ARHGAP29,PRDM10,BAP1,FRMPD4,SGIP1,XRCC4,ARHGEF2,DEPDC1,TOPBP1,SMTN,SKIL,TRAF5,TRIM28,EPS15,RBPJL,RAD18,WWC1,RNF168,NOS1,TRAF3,TSNARE1,CCM2,SIAH1,SMTNL2,TRAF1,RYBP,RASSF2,AXIN1,LRRC43,CLMN,USP33,ARHGEF7,BUB1B,AFDN,AKAP10,AXIN2,BAIAP2L2,BARD1,BCR,BMPR2,CBL,CEP97,CRBN,CTDP1,DAB2IP,DDX58,DICER1,DZIP1,E2F7,E2F8,EHBP1,EPS15L1,ERCC5,FANCM,FRMPD1,GPR156,IMPACT,KDM3A,KSR1,LMTK2,MID1,MRGBP,MYRIP,MYS…	0.003113	0.02	0.1418
HOST:280	BRCA2,BRCA1,RBM44,CRYBG3,CEP192,ATAD5,ICE1,SGO2,TET1	0.024231	0.02	0.1418
HOST:281	KMT2C,KMT2E,SRCAP,CHD4,SMARCA4,ORC1,GLYR1,SMARCA1,MBTD1,SCML2,PHF12,JADE3,BRD8,KAT6B,PHF20,PIAS4,BRF1,NXF1,ANP32E,HMGB2,SMARCA2,HNRNPU,NT5DC3,CBX3,TBC1D5,SMARCB1,BRD7,CBX5,ING3,PARP1,MCRS1,KAT8,JADE2,KAT6A,LIN28A,ASH2L,BCL3,BOD1,BOD1L2,BRD1,BRD9,BRPF1,BRPF3,CHD3,CHD5,CSNK2B,CXXC1,DBI,DCLRE1C,DGKI,DNMT3A,DNMT3B,DPF1,DPF2,DPF3,ECT2,ERN1,ERN2,EXOSC10,FBXL19,HMGB1,HNRNPUL1,ING2,ING4,ING5,INO80,JADE1,…	0.153701	0.02	0.1418
HOST:286	C7,C9,UGGT1,C6,PTN,EPPIN,ALK,C8A,C8B,IGF2R,UGGT2	0.001067	0.04	0.2477
HOST:307	HSPD1,CCT6B,CCT2,CCT3,CCT7,CCT8,CCT4,CCT5,CCT6A,TCP1	0.001982	0.03	0.2477
HOST:317	CDH1,CDH20,CDH12,DCHS1,CDH10,CDH8,CDH24,CDHR3,CDH11,CDH13,CDH15,CDH17,CDH19,CDH2,CDH22,CDH23,CDH26,CDH3,CDH4,CDH5,CDH6	0.016878	0.02	0.1418
HOST:344	COL4A5,COL4A3,COL8A1,COL10A1,COL19A1,COL4A6,COL9A3,COL4A4,COL16A1,COL4A1,COL4A2,COL8A2,COL9A1,COL9A2	0.002264	0.03	0.2321
HOST:345	RPTOR,AP1G2,BCKDK,XPO1,CNOT6,FNTB,COPG1,API5,PSMD1,TCEA1,APEX1,COPG2,PDK2,RABGGTB,AP1B1,PSMD5,GGA1,AP1G1,AP2A1,AP2A2,AP2B1,AP4B1,AP4E1,BIN1,CEBPZ,CNOT6L,COPB1,ENO4,GGA3,INTS7,PARP4,PDK1,PGGT1B,PPP2R1A,PPP2R1B,PSMD2,RICTOR,SCYL1,TCEA2	0.001586	0.04	0.2477
HOST:348	RUNX1,CPEB1,RUNX2,CPEB2,CNOT4,CPEB3,CPEB4,RUNX3	0.002993	0.02	0.1418
HOST:383	EIF4A2,DDX5,EIF4A3,DDX17,EIF4A1,DDX19B,DDX39B,DDX3X	0.00689	0.02	0.1418
HOST:397	HNRNPH3,A1CF,GRPEL2,SYNCRIP,HNRNPH2,ESRP2,METTL18,COQ3,HNRNPR,ESRP1,CYB5B,GRPEL1,GRSF1,HNRNPF,HNRNPH1,TFAM,TREX1	0.000985	0.04	0.2477
HOST:407	DCAF17,FANCB	0.000853	0.04	0.2477
HOST:415	FBXW7,TRAF7,BTRC,FBXW11	0.007578	0.02	0.1418
HOST:420	KMT2D,FLYWCH1	0.000993	0.04	0.2477
HOST:426	G3BP2,G3BP1	0.005864	0.03	0.2321
HOST:450	EFTUD2,EEF2,GSPT2,GSPT1,DRG1,EEFSEC,EFL1,EIF2S3,GTPBP1	0.000482	0.04	0.2477
HOST:465	PMS1,MLH1,HSP90AA1,HSP90AB1,HSP90B1	0.000998	0.04	0.2477
HOST:501	KIF16B,KIF1A,KIF1C,KIF13A,KIF13B,KIF1B,KIF2A	0.001132	0.04	0.2477
HOST:511	USH2A,LAMA2,LAMC1,THBS1,COMP,LAMB1,LAMB2,LAMA1,LAMA3,LAMA5,NTN4,NTNG1,NTNG2,WNT2,WNT3,WNT3A	0.001786	0.04	0.2477
HOST:541	JMJD1C,MED1,REV3L,MED13,MED13L,MAP2,KDM3B,GCM1,LIN37,ANAPC1,ATG13,ICE2,MBIP,MED19,MGA,POLR2M,POU2AF1,STIL,TP53BP1,UNC80	0.004103	0.02	0.1418
HOST:574	MYH9,MYH14,MYH10,MYH11	0.014251	0.02	0.1418
HOST:575	MYH7,EEF1A1,MYH8,EEF1A2,MYH4,MYH1,MYH13,MYH2,MYH3,MYH6,TUBB	0.001671	0.03	0.2477
HOST:578	MYO6,MYO7B,MYO10,MYH7B,MYO16,MYO7A,MYO1A,MYH15,MYO18A,MYO19,MYO1B,MYO1C,MYO1D,MYO1E,MYO1F,MYO1G,MYO3A,MYO3B,MYO5A,MYO5B,MYO5C,MYO9A,MYO9B	0.001996	0.03	0.2321
HOST:597	BACH2,ATF6,NFE2L3,NFE2,ATF4,ATF6B,BACH1,CREB3,MYC,NFE2L2,NFIL3	0.002925	0.03	0.2321
HOST:608	NRIP1,BCOR	0.006693	0.02	0.1418
HOST:614	POM121,NUP62,NUP54,NUP153,NUP98,NUP50,NUP58,POM121C	0.001197	0.03	0.2477
HOST:617	AKAP9,TPR,RABEP1,CEP290,ODF2,SCLT1,EEA1,CEP128,CEP83	0.020845	0.02	0.1418
HOST:638	PHKA2,PHKA1,PHKB	0.004959	0.02	0.1418
HOST:641	PIK3CA,PIK3CB,PIK3CD,PIWIL2,PRMT5,PDSS1,B9D1,B9D2,FAU,ISG15,PDSS2,PIK3C3,PIK3CG	0.053764	0.03	0.2321
HOST:668	AKT1,PRKACA,PRKX,AKT2,PRKACB	0.001964	0.03	0.2477
HOST:739	SCN10A,SCN11A,MCOLN1,CATSPER3,PKD2,SCN7A,CATSPER2,ABCA2,PKD2L1,SCAP,SCN4A,SCN5A	0.003982	0.03	0.2477
HOST:782	DMD,ACTN4,SPTA1,SPTB,UTRN,FLNA,SPTBN2,IQGAP1,SPTAN1,SPTBN1,SPTBN4,SPTBN5,SYNE1,SYNE2	0.008456	0.02	0.1418
HOST:814	BCLAF1,THRAP3,ZC3H13	0.004878	0.02	0.1418
HOST:815	NUP210L,NOTCH2,COL12A1,CRB1,COL14A1,TNR,RELN,NOMO2,NRP2,FN1,LIPC,ADGRA2,ATP23,CNTNAP2,COL7A1,FLT1,FLT4,LPL,MEP1A,MEP1B,NEO1,NOTCH1,NOTCH3,NRP1,NUP210,OBSL1,TEK,TIE1,TNC,TNXB	0.00284	0.03	0.2321
HOST:818	TLR7,TLR4,UGT3A2,LUM,TLR1,TLR10,TLR2,TLR6,UGT3A1	0.001676	0.04	0.2477
HOST:831	TRA2B,RBMXL1,SRSF2,TRA2A,RNPS1,RBMX,SRSF1	0.001048	0.04	0.2477
HOST:841	SF3B1,CRNKL1,ANAPC5,TTC21A,TTC30B,PEX5L,IFT88,ANAPC7,CNOT10,SART3,NAA15,TTC37,PRPF39,COPE,CTR9,EMC2,FNTA,GTF3C3,MAU2,NAA16,NAA25,PEX5,PRPF6,RABGGTA,SRP72,TTC21B,TTC26,TTC30A,TTC8,UTP6,XAB2	0.003944	0.03	0.2477
HOST:861	TAF1,TAF1L,TOB1,EPC1,KANSL1,RAD21,CEP170,AKAP6,APBB1IP,INO80D,WBP11,GTF2E1,ATXN7L3,WASF1,CHTOP,DROSHA,EIF4G1,EIF4G3,EPC2,HIPK2,KANSL1L,KANSL2,LEO1,LMO7,MSL2,PCM1,SF3B2,SUPT20H,SYNPO2,WASF2,WASF3,WASHC1,WNK1	0.003139	0.03	0.2477
HOST:867	GNL3L,FTSJ3,RBBP5,WDR46,TSR1,BMS1,BYSL,IMP3,NOL10,PPAN,PPWD1,UTP18	0.000595	0.04	0.2477
